# Supplementary material for: Detection of nonfluorescent cyhalothrin in honey by a spheral SiO2-based particle coating with thin fluorescent molecularly imprinted polymers film
Source: Royal Society of Chemistry journal article supplement (doi:10.1039/c5ra17851g), 2015-01-01
Supplement: c5ra17851g1.pdf [file c5ra17851g1.pdf]

**Scheme S1 Synthetic scheme for Allyl fluorescein.**

Fig.S1 SEM image of SiO<sub>2</sub>@KH570.

Fig.S2 SEM images of SiO<sub>2</sub>@KH570-MIP nanospheres with the decrease of the amount of monomer and crosslinker: 1~4 (from a to d).

Fig.S3 TEM images of SiO<sub>2</sub>@KH570-MIP nanospheres with the decrease of the amount of monomer and crosslinker: 1~4 (from a to d).

Fig.S4 Reuse results of SiO<sub>2</sub>@KH570-MIPs for five times.

Table S1. Amounts of reactants used in the SiO<sub>2</sub>@KH570-MIPs synthesis

Scheme S1 and Figures S1~S4

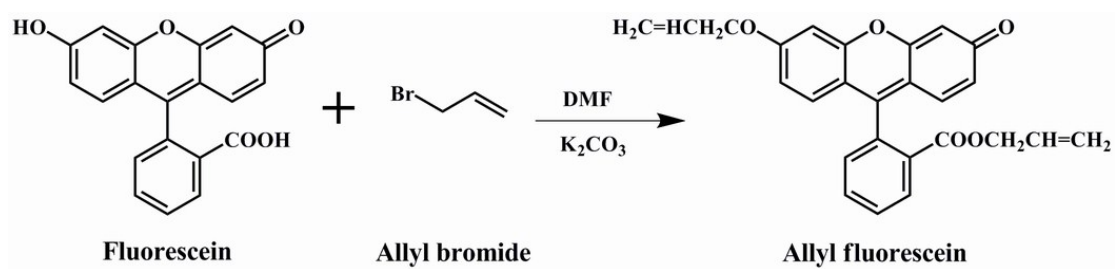

Scheme S1

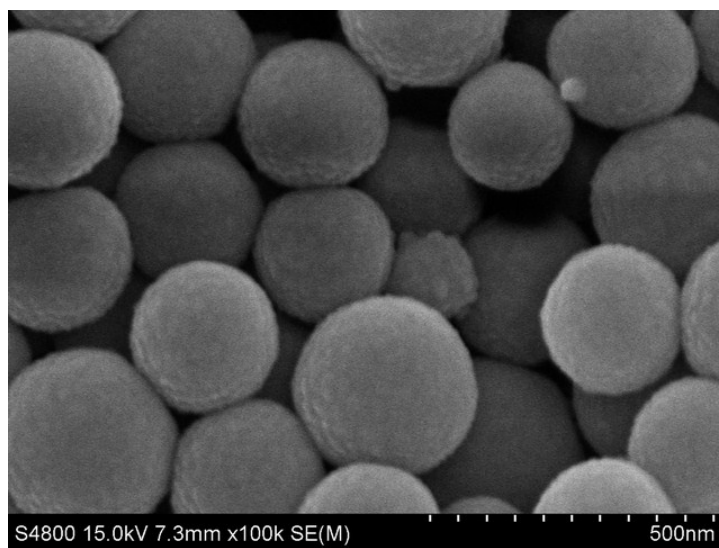

Fig.S1

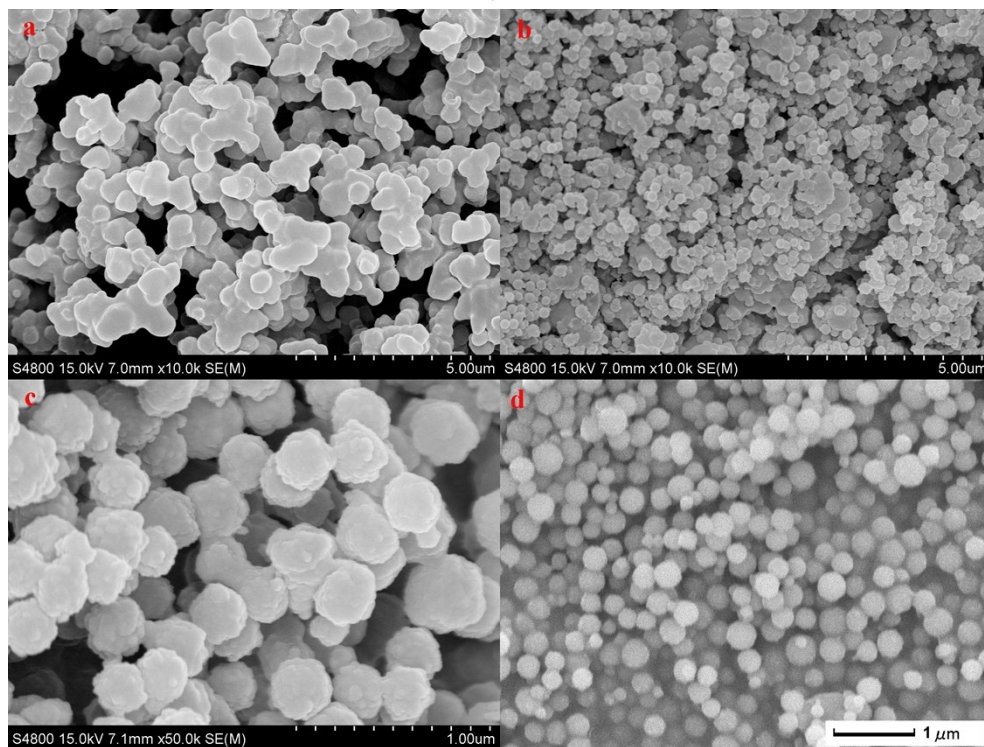

Fig.S2

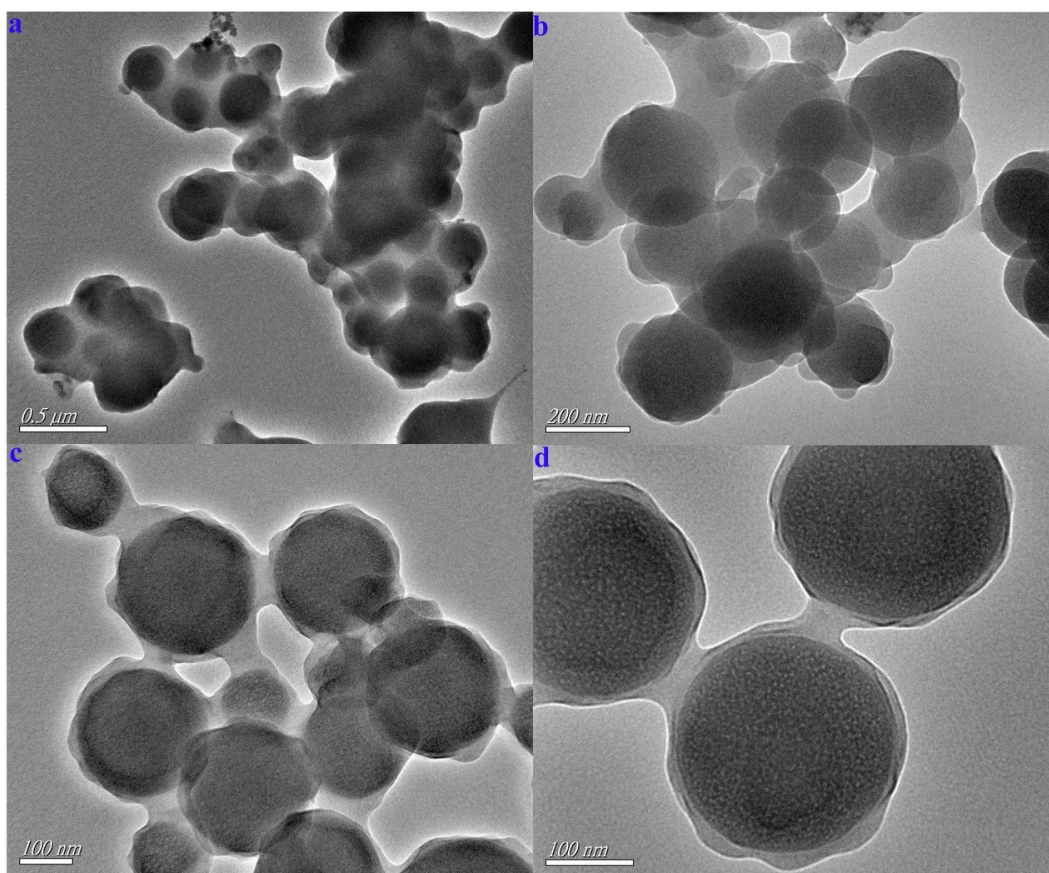

Fig.S3

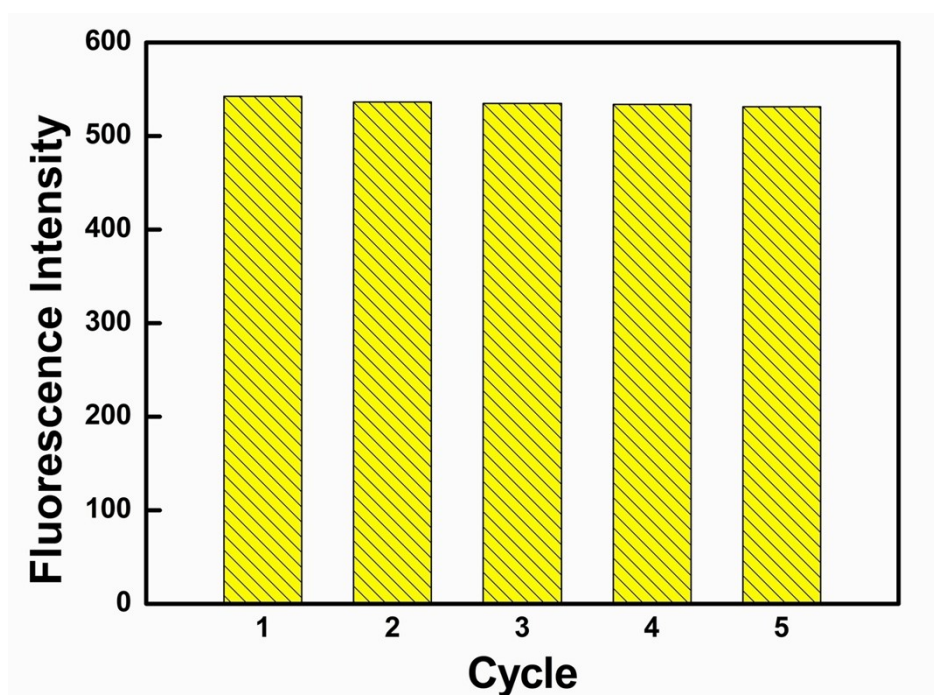

Fig.S4

Table S1

| Number of<br>SiO <sub>2</sub> @KH570-MIPs | SiO <sub>2</sub> (mg) | AM (g) | EGDMA<br>(mL) | Cyhalothrin<br>(g) |
|-------------------------------------------|-----------------------|--------|---------------|--------------------|
| <b>1</b>                                  | 300                   | 0.2870 | 0.8           | 0.4430             |
| <b>2</b>                                  | 300                   | 0.1434 | 0.4           | 0.2334             |
| <b>3</b>                                  | 300                   | 0.0712 | 0.2           | 0.1156             |
| <b>4</b>                                  | 300                   | 0.0356 | 0.1           | 0.0578             |
